# Supplementary material for: 3D printing of MXene composite hydrogel scaffolds for photothermal antibacterial activity and bone regeneration in infected bone defect models
Source: Royal Society of Chemistry journal article supplement (doi:10.1039/d2nr02176e), 2022-01-01
Supplement: d2nr02176e1.pdf [file d2nr02176e1.pdf]

## Supporting Information

### **3D Printing of MXene Composite Hydrogel Scaffolds for Photothermal Antibacterial Activity and Bone Regeneration in Infected Bone Defect Models**

Ran Nie,<sup>a, b</sup> Yue Sun,<sup>a, b</sup> Huixin Lv,<sup>a, b</sup> Ming Lu,<sup>c, d</sup> Huimin Huangfu,<sup>a, b</sup> Yangyang Li,<sup>a, b</sup> Yidi Zhang,<sup>\*a, b</sup> Dongyang Wang,<sup>\*b</sup> Lin Wang<sup>\*a, b</sup> and Yanmin Zhou<sup>\*a, b</sup>

<sup>a</sup>*Department of Oral Implantology, Hospital of Stomatology, Jilin University, Changchun, 130021, China.*

<sup>b</sup>*Jilin Provincial Key Laboratory of Tooth Development and Bone Remodeling, Hospital of Stomatology, Jilin University, Changchun, 130021, China.*

<sup>c</sup>*The Joint Laboratory of MXene Materials; Key Laboratory of Functional Materials Physics and Chemistry of the Ministry of Education, Jilin Normal University, Changchun 130103, Jilin, China.*

<sup>d</sup>*Shenyang National Laboratory for Materials Science, Institute of Metal Research, Chinese Academy of Sciences, Shenyang 110016, Liaoning, China.*

*\*Corresponding authors. E-mail: [zhouym@jlu.edu.cn](mailto:zhouym@jlu.edu.cn) (Yanmin Zhou), [wanglin1982@jlu.edu.cn](mailto:wanglin1982@jlu.edu.cn) (Lin Wang), [dYang314@jlu.edu.cn](mailto:dYang314@jlu.edu.cn) (Dongyang Wang), [zhangyidi@jlu.edu.cn](mailto:zhangyidi@jlu.edu.cn) (Yidi Zhang)*

**Table S1** Primer sequences used for Real-time PCR.

| Gene           | Forward sequence          | Reverse sequence          |
|----------------|---------------------------|---------------------------|
| IL-1 $\beta$   | CCCTGAACTCAACTGTGAAATAGCA | CCCAAGTCAAGGGCTTGGAA      |
| TNF- $\alpha$  | GGCGTGTTTCATCCGTTCTC      | CTTCAGCGTCTCGTGTGTTTCT    |
| IL-10          | CAGACCCACATGCTCCGAGA      | CAAGGCTTGGCAACCCAAGTA     |
| RUNX2          | CATGGCCGGAATGATGAG        | TGTGAAGACCGTTATGGTCAAAGTG |
| ALP            | CATCGCCTATCAGCTAATGCACA   | ATGAGGTCCAGGCCATCCAG      |
| OCN            | AAGCAGGAGGGCAATAAGGT      | CCGTAGATGCGTTTGTAGGC      |
| $\beta$ -actin | GGAGATTACTGCCCTGGCTCCTA   | GACTCATCGTACTCCTGCTTGCTG  |

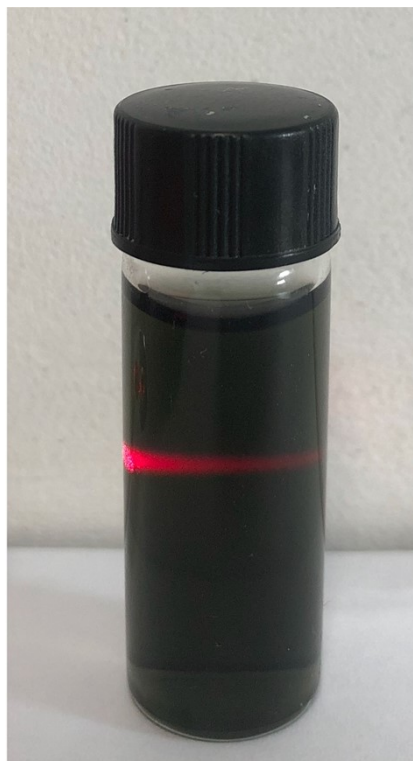

**Fig. S1** Image of the dispersion in aqueous solution of  $\text{Ti}_3\text{C}_2$  nanosheets with the Tyndall effect.

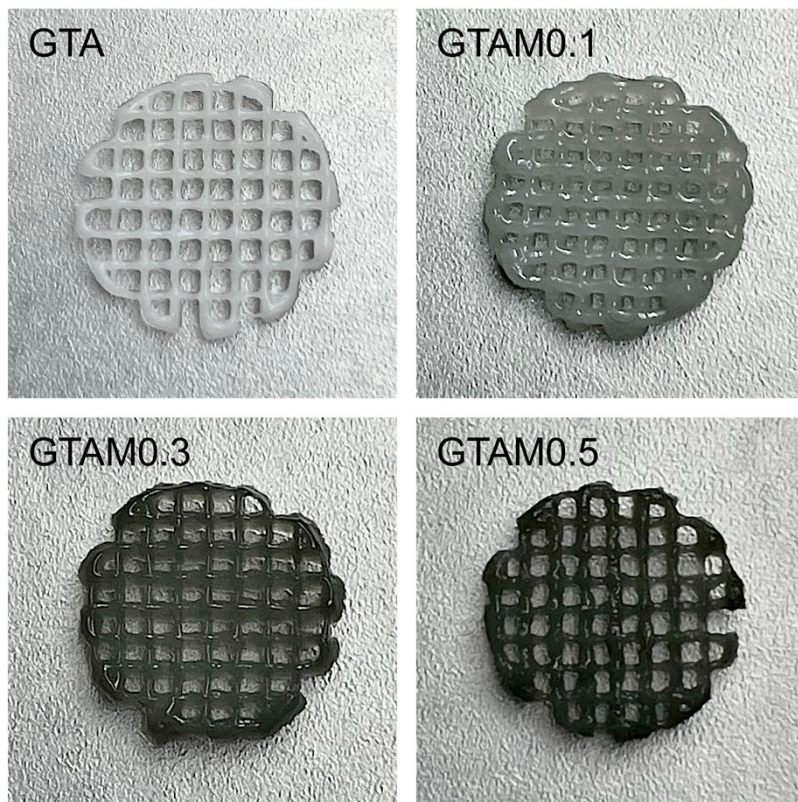

**Fig. S2** Photographs of the 3D printed hydrogel scaffolds.

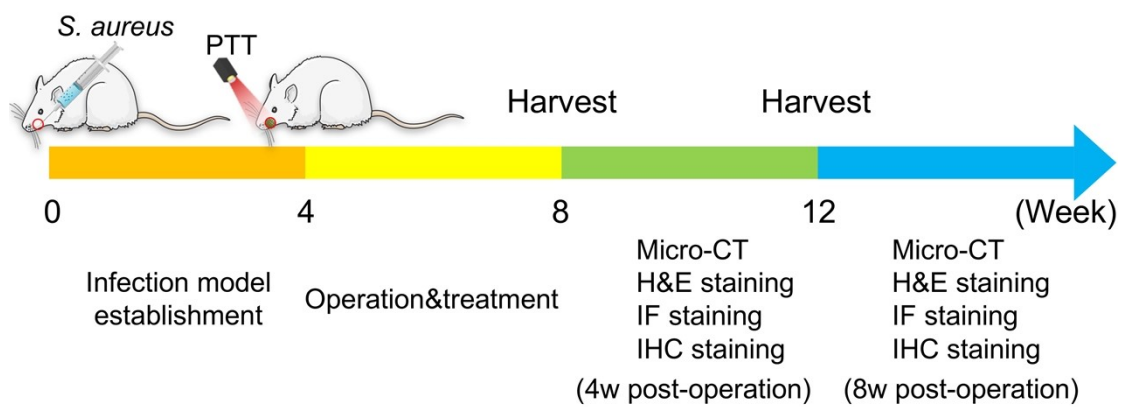

**Fig. S3** Schematic illustration of animal experiment procedures from infected mandibular defect model establishment to harvest of specimen.

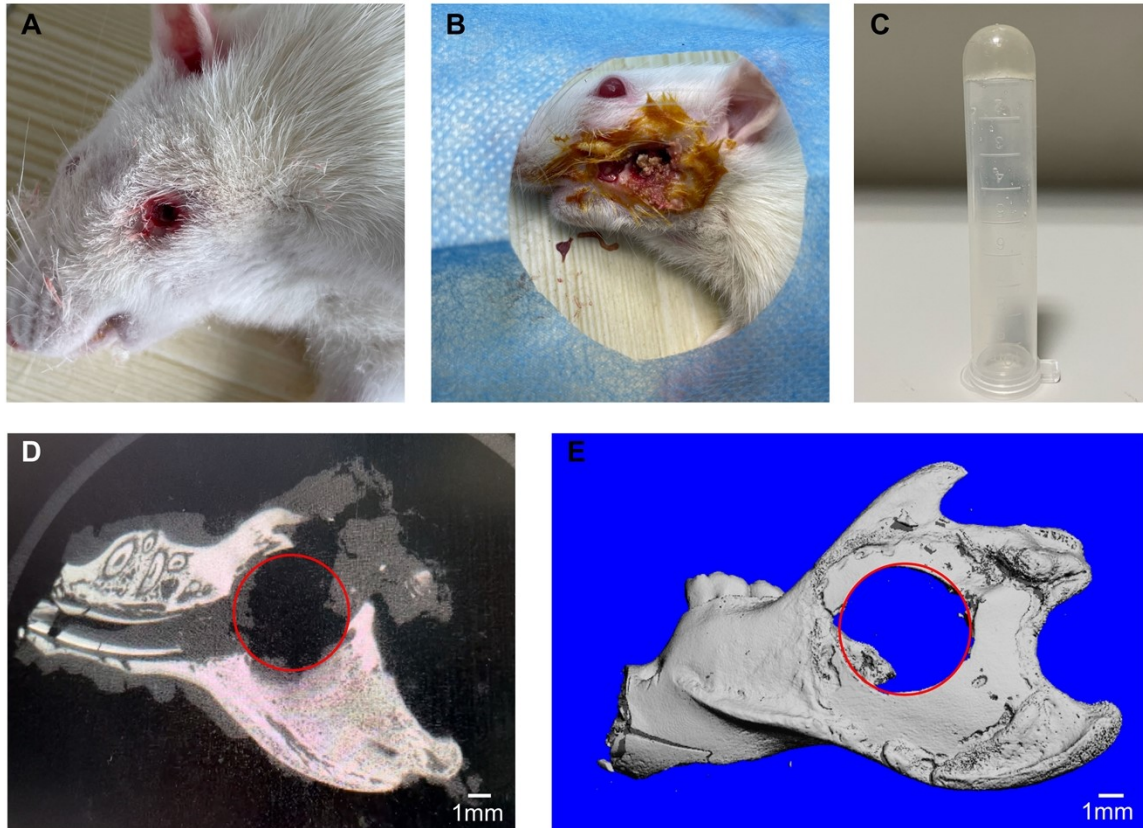

**Fig. S4** Assessments of mandibular osteomyelitis infection models of rats after 4 w of inoculation of *S. aureus*. (A-B) Gross observation of the rat. (C) Plasma coagulase assay of infection tissues in the rat mandible. (D) Micro-CT image of the rat mandible. (E) Micro-CT 3D reconstruction image of the rat mandible.

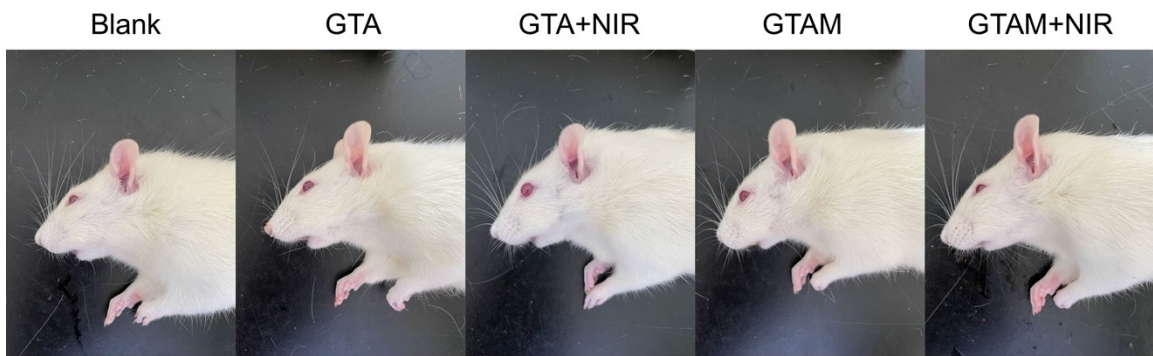

**Fig. S5** Gross observation of rats after 4 w of 3D printed scaffolds implantation.

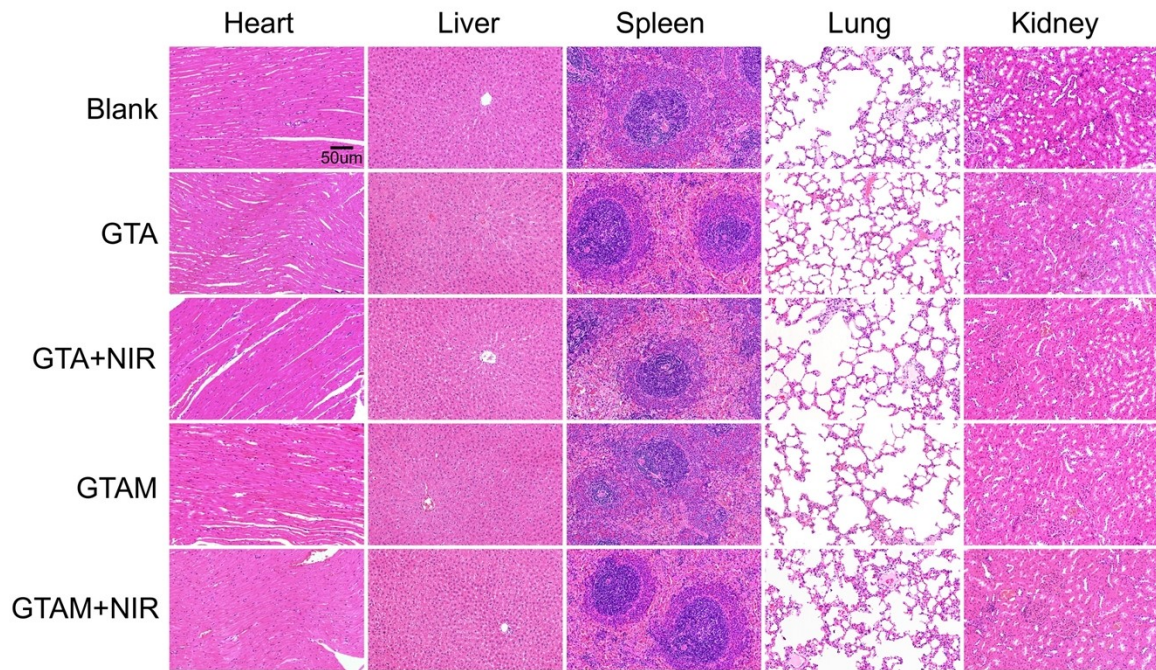

**Fig. S6** H&E staining of the main organs (heart, liver, spleen, lung and kidney tissues) after 4 w of 3D printed scaffolds implantation.
